# Supplementary material for: Incorporation of spin-5/2 chain into 2D network with conformational pure e,a-cis-cyclohexane-1,4-dicarboxylato linker
Source: Royal Society of Chemistry journal article supplement (doi:10.1039/c2dt31613g), 2012-01-01
Supplement: c2dt31613g.pdf [file c2dt31613g.pdf]

*Supporting Information for*

## **Incorporation of Spin-5/2 Chain into 2D Network with Conformational Pure *e,a-cis*-Cyclohexane-1,4-Dicarboxylato Linker**

Yan-Zhen Zheng<sup>a,b\*</sup> and Xiao-Ming Chen<sup>b</sup>

<sup>a</sup> Centre for Applied Chemical Research, Frontier Institute of Science and Technology, Xi'an Jiaotong University, Xi'an 710054, China.

<sup>b</sup> MOE Key Laboratory of Bioinorganic and Synthetic Chemistry, School of Chemistry and Chemical Engineering, Sun Yat-Sen University, Guangzhou 510275, China.

Email: zheng.yanzhen@mail.xjtu.edu.cn

**Synthesis.** In a typical hydrothermal reaction, a mixture of  $\text{FeCl}_3 \cdot 4\text{H}_2\text{O}$  (0.234 g, 1 mmol), 1,4-chdcH<sub>2</sub> (mixture of *cis*- and *trans*- conformation) (0.172 g, 1 mmol), NaOH (0.060 g, 1.5 mmol) in a molar ratio of 1:1:1.5 in deionized water (15 ml) was sealed in a 23-ml Teflon-lined autoclave and heated at 160 °C for 2 d to give yellow needle-like crystals of **1** (yield 15 % based on 1,4-chdcH<sub>2</sub>). Elemental analysis, C<sub>8</sub>H<sub>11</sub>FeO<sub>5</sub>, calcd.: C, 53.95%; H, 4.56%; found: 53.70%; H, 4.62 %.

**Magnetic measurement.** Magnetic susceptibility measurements of **1** were performed on a poly-crystalline sample on a Quantum Design MPMS-XL7 SQUID. Data were corrected for the diamagnetic contribution calculated from Pascal constants.

10

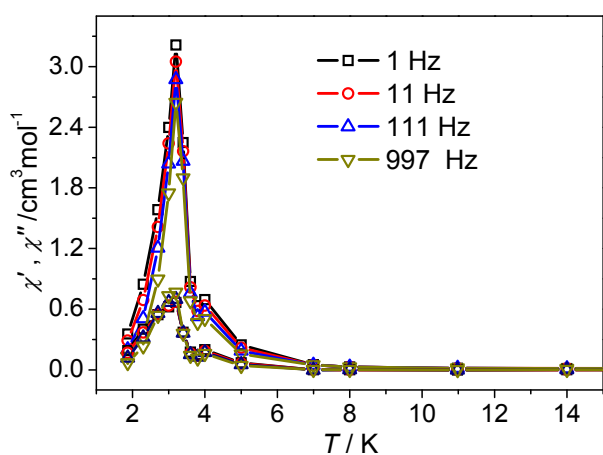

Fig. S1 Temperature-dependent alternating-current susceptibility data at indicated frequencies.

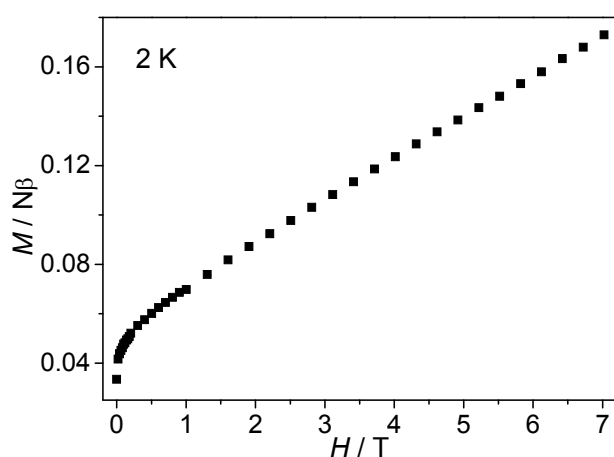

15 Fig. S2 Field-dependent direct-current susceptibility data at 2 K.
